# Supplementary material
Source: PubMed Central journal article supplement (PMC8945575)

## Supplemental Table 1: Covariates Included in Multivariable Regression Analysis

### **Patient- and disease-specific characteristics, including:**

- Age 18-59 vs.  $\geq 60$
- KPS: 90-100 vs.  $< 90$  vs. missing
- Hematopoietic cell transplantation-comorbidity index: 0-2 vs.  $\geq 3$  vs. missing
- High risk fish abnormalities: 17p +/- others vs. 11q deletion +/- others except 17p vs. Trisomy 12 (+12) +/- others except 17p and/or 11q vs. Normal Fish vs. Deletion of 13q alone vs. others vs. missing
- Received novel agents before HCT: Yes vs. No
- Number of prior therapy regimens received for RS : 1 vs. 2 vs. 3+
- Time from RS diagnosis to transplant (months) :  $< 12$  months vs.  $\geq 12$  months
- Remission status (at HCT): CR vs. PR vs. Resistant vs. Unknown

### **Transplantation-specific characteristics, including:**

- Donor type: HLA-matched vs. matched URD vs. others (HLA mismatched, mismatched URD, CB)
- Conditioning intensity: NMA/RIC vs. MAC
- Year of transplant:  $\leq 2013$  vs.  $> 2013$
- Transplant center

Allo indicates allogeneic, HCT indicates hematopoietic cell transplantation, KPS indicates Karnofsky performance status, RS indicates Richter syndrome, CR indicates complete response, PR indicates partial response, URD indicates unrelated donor, HLA indicates human leukocyte antigen, CB indicates cord blood, NMA indicates non-myeloablative conditioning, RIC indicates reduced intensity conditioning, MAC indicates myeloablative conditioning

**Supplemental Table 2: Adjusted Outcomes After Allo-HCT According to Presence of 17p Abnormality**

| Outcomes         | 17p +/- others<br>(N = 39) |               | Others<br>(N = 55) |               | P value |
|------------------|----------------------------|---------------|--------------------|---------------|---------|
|                  | N                          | Prob (95% CI) | N                  | Prob (95% CI) |         |
| Adjusted Relapse | 37                         |               | 54                 |               |         |
| 1-year           |                            | 30 (16-44)%   |                    | 22 (11-33)%   | 0.37    |
| 3-year           |                            | 37 (22-51)%   |                    | 32 (19-44)%   | 0.62    |
| Adjusted NRM     | 37                         |               | 54                 |               |         |
| 1-year           |                            | 21 (9-32)%    |                    | 22 (11-33)%   | 0.88    |
| 3-year           |                            | 25 (11-38)%   |                    | 26 (15-37)%   | 0.90    |
| Adjusted PFS     | 37                         |               | 54                 |               |         |
| 1-year           |                            | 47 (33-61)%   |                    | 59 (47-71)%   | 0.20    |
| 3-year           |                            | 38 (24-52)%   |                    | 45 (32-57)%   | 0.45    |
| Adjusted OS      | 39                         |               | 55                 |               |         |
| 1-year           |                            | 67 (55-80)%   |                    | 74 (63-84)%   | 0.44    |
| 3-year           |                            | 50 (36-65)%   |                    | 54 (42-66)%   | 0.71    |

Allo indicates allogeneic, HCT indicates hematopoietic cell transplantation, CR indicates complete response, PR indicates partial response, NRM indicates non-relapse mortality, PFS indicates progression-free survival, OS indicates overall survival

**Supplemental Table 3: Multivariate Regression Analysis of Outcomes After Allo-HCT According to Receipt of Novel Agents Prior to Allo-HCT**

|                                              | N  | HR    | 95% CI<br>Lower<br>Limit | 95% CI<br>Upper<br>Limit | p-value | Overall<br>p-value |
|----------------------------------------------|----|-------|--------------------------|--------------------------|---------|--------------------|
| <b>NRM</b>                                   |    |       |                          |                          |         |                    |
| <b>Received novel agents before allo-HCT</b> |    |       |                          |                          |         |                    |
| No                                           | 68 | 1     |                          |                          |         | 0.7233             |
| Yes                                          | 43 | 0.871 | 0.406                    | 1.87                     | 0.7233  |                    |
| <b>Relapse</b>                               |    |       |                          |                          |         |                    |
| <b>Received novel agents before allo-HCT</b> |    |       |                          |                          |         |                    |
| No                                           | 68 | 1     |                          |                          |         | 0.4013             |
| Yes                                          | 43 | 1.345 | 0.673                    | 2.686                    | 0.4013  |                    |
| <b>PFS</b>                                   |    |       |                          |                          |         |                    |
| <b>Received novel agents before allo-HCT</b> |    |       |                          |                          |         |                    |
| No                                           | 68 | 1     |                          |                          |         | 0.3097             |
| Yes                                          | 43 | 1.298 | 0.785                    | 2.145                    | 0.3097  |                    |
| <b>OS</b>                                    |    |       |                          |                          |         |                    |
| <b>Received novel agents before allo-HCT</b> |    |       |                          |                          |         |                    |
| No                                           | 69 | 1     |                          |                          |         | 0.1045             |
| Yes                                          | 46 | 1.552 | 0.913                    | 2.639                    | 0.1045  |                    |

Allo indicates allogeneic, HCT indicates hematopoietic cell transplantation, HR indicates hazard ratio, CI indicates confidence interval, NRM indicates non-relapse mortality, PFS indicates progression-free survival, OS indicates overall survival

**Supplemental Table 4: Causes of Death After HCT**

| <b>Characteristic</b>               | <b>Allo-HCT</b> | <b>Auto-HCT</b>    |
|-------------------------------------|-----------------|--------------------|
| No. of patients                     | 118             | 53                 |
| Overall survival - no. (%)          |                 |                    |
| Alive                               | 57 (48)         | 30 (57)            |
| Dead                                | 61 (52)         | 23 (43)            |
| Cause of death - no. (%)            |                 |                    |
| Primary disease                     | 24 (39)         | 11 (48)            |
| Graft-versus-host disease           | 13 (21)         | 2 (9) <sup>1</sup> |
| Infection                           | 7 (11)          | 1 (4)              |
| Idiopathic pneumonia syndrome       | 1 (2)           | 0                  |
| Acute respiratory distress syndrome | 2 (3)           | 0                  |
| Organ failure                       | 6 (10)          | 2 (9)              |
| Second malignancy                   | 1 (2)           | 1 (4)              |
| Hemorrhage                          | 1 (2)           | 1 (4)              |
| Accident/suicide                    | 1 (2)           | 0                  |
| Vascular                            | 1 (2)           | 0                  |
| Other                               | 4 (6)           | 5 (22)             |

Allo indicates allogeneic, Auto indicates autologous, HCT indicates hematopoietic cell transplantation

<sup>1</sup> Two patients who underwent auto-HCT relapsed and subsequently underwent allo-HCT and developed GVHD thereafter

**Supplemental Figure: Outcomes After Allo-HCT According to Presence of 17p Abnormality; (A) Non-Relapse Mortality, (B) Relapse/Progression, (C) Progression-Free Survival, (D) Overall Survival**

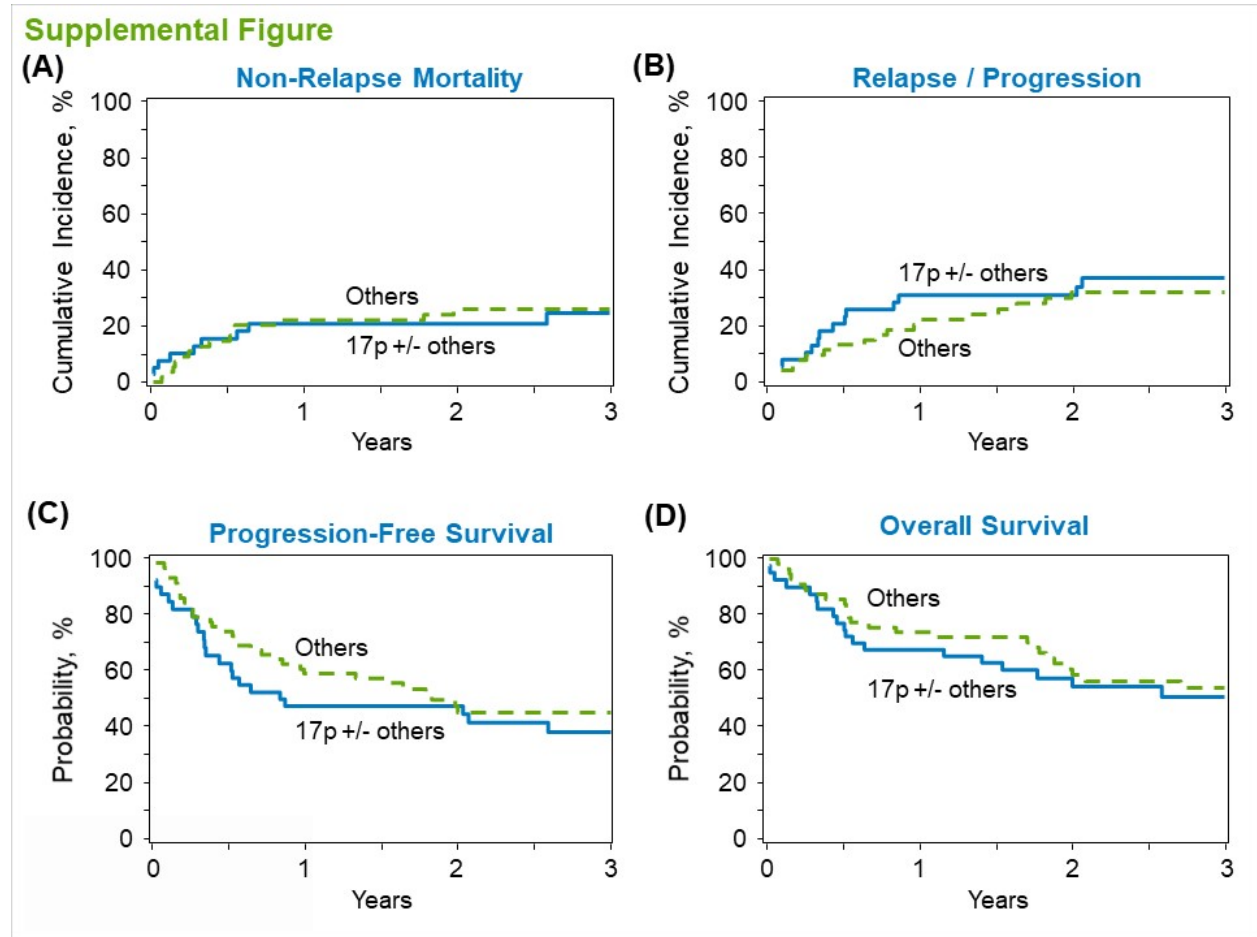

Supplement: advancesADV2021004865-suppl1.pdf [file advancesADV2021004865-suppl1.pdf]
